# Supplementary material
Source: publisher figshare collection journal article supplement (https://acs.figshare.com/ndownloader/files/4782691)
Supplement: Supplementary file 1 [file 4782691]

  

data_fen1 

  

_audit_creation_method            SHELXL-97 

_chemical_name_systematic 

; 

 ? 

; 

_chemical_name_common             ? 

_chemical_melting_point           ? 

_chemical_formula_moiety          ? 

_chemical_formula_sum 

 'C25 H32 Cl2 N2 O5' 

_chemical_formula_weight          511.43 

  

loop_ 

 _atom_type_symbol 

 _atom_type_description 

 _atom_type_scat_dispersion_real 

 _atom_type_scat_dispersion_imag 

 _atom_type_scat_source 

 'C'  'C'   0.0033   0.0016 

 'International Tables Vol C Tables 4.2.6.8 and 6.1.1.4' 

 'H'  'H'   0.0000   0.0000 

 'International Tables Vol C Tables 4.2.6.8 and 6.1.1.4' 

 'N'  'N'   0.0061   0.0033 

 'International Tables Vol C Tables 4.2.6.8 and 6.1.1.4' 

 'O'  'O'   0.0106   0.0060 

 'International Tables Vol C Tables 4.2.6.8 and 6.1.1.4' 

 'Cl'  'Cl'   0.1484   0.1585 

 'International Tables Vol C Tables 4.2.6.8 and 6.1.1.4' 

  

_symmetry_cell_setting            Orthorhombic 

_symmetry_space_group_name_H-M    P2(1)2(1)2(1) 

  

loop_ 

 _symmetry_equiv_pos_as_xyz 

 'x, y, z' 

 '-x+1/2, -y, z+1/2' 

 '-x, y+1/2, -z+1/2' 

 'x+1/2, -y+1/2, -z' 

  

_cell_length_a                    11.487(4) 

_cell_length_b                    11.553 

_cell_length_c                    20.483(7) 

_cell_angle_alpha                 90.00 

_cell_angle_beta                  90.00 

_cell_angle_gamma                 90.00 

_cell_volume                      2718.3(14) 

_cell_formula_units_Z             4 

_cell_measurement_temperature     100(2) 

_cell_measurement_reflns_used     6062 

_cell_measurement_theta_min       2.50 

_cell_measurement_theta_max       27.27 

  

_exptl_crystal_description        plate 

_exptl_crystal_colour             colorless 

_exptl_crystal_size_max           0.20 

_exptl_crystal_size_mid           0.20 

_exptl_crystal_size_min           0.05 

_exptl_crystal_density_meas       0 

_exptl_crystal_density_diffrn     1.247 

_exptl_crystal_density_method     'not measured' 

_exptl_crystal_F_000              1080 

_exptl_absorpt_coefficient_mu     0.274 

_exptl_absorpt_correction_type    empirical

_exptl_absorpt_correction_T_min   0.9472 

_exptl_absorpt_correction_T_max   0.9864 

_exptl_absorpt_process_details    sadabs 

  

_exptl_special_details 

; 

 ? 

; 

  

_diffrn_ambient_temperature       100(2) 

_diffrn_radiation_wavelength      0.71073 

_diffrn_radiation_type            MoK\a 

_diffrn_radiation_source          'fine-focus sealed tube' 

_diffrn_radiation_monochromator   graphite 

_diffrn_measurement_device_type   'CCD area detector' 

_diffrn_measurement_method        'phi and omega scans' 

_diffrn_detector_area_resol_mean  ? 

_diffrn_standards_number          ? 

_diffrn_standards_interval_count  ? 

_diffrn_standards_interval_time   ? 

_diffrn_standards_decay_%         ? 

_diffrn_reflns_number             14742 

_diffrn_reflns_av_R_equivalents   0.0697 

_diffrn_reflns_av_sigmaI/netI     0.0800 

_diffrn_reflns_limit_h_min        -14 

_diffrn_reflns_limit_h_max        14 

_diffrn_reflns_limit_k_min        -14 

_diffrn_reflns_limit_k_max        13 

_diffrn_reflns_limit_l_min        -25 

_diffrn_reflns_limit_l_max        24 

_diffrn_reflns_theta_min          1.99 

_diffrn_reflns_theta_max          26.50 

_reflns_number_total              5366 

_reflns_number_gt                 4317 

_reflns_threshold_expression      >2sigma(I) 

  

_computing_data_collection        'Bruker SMART' 

_computing_cell_refinement        'Bruker SMART' 

_computing_data_reduction         'Bruker SAINT' 

_computing_structure_solution     'SHELXS-97 (Sheldrick, 1990)' 

_computing_structure_refinement   'SHELXL-97 (Sheldrick, 1997)' 

_computing_molecular_graphics     'Bruker SHELXTL' 

_computing_publication_material   'Bruker SHELXTL' 

  

_refine_special_details 

; 

 Refinement of F^2^ against ALL reflections.  The weighted R-factor wR and 

 goodness of fit S are based on F^2^, conventional R-factors R are based 

 on F, with F set to zero for negative F^2^. The threshold expression of 

 F^2^ > 2sigma(F^2^) is used only for calculating R-factors(gt) etc. and is 

 not relevant to the choice of reflections for refinement.  R-factors based 

 on F^2^ are statistically about twice as large as those based on F, and R- 

 factors based on ALL data will be even larger. 

; 

  

_refine_ls_structure_factor_coef  Fsqd 

_refine_ls_matrix_type            full 

_refine_ls_weighting_scheme       calc 

_refine_ls_weighting_details 

 'calc w=1/[\s^2^(Fo^2^)+(0.0650P)^2^+0.2000P] where P=(Fo^2^+2Fc^2^)/3' 

_atom_sites_solution_primary      direct 

_atom_sites_solution_secondary    difmap 

_atom_sites_solution_hydrogens    geom 

_refine_ls_hydrogen_treatment     mixed 

_refine_ls_extinction_method      none 

_refine_ls_extinction_coef        ? 

_refine_ls_abs_structure_details 

 'Flack H D (1983), Acta Cryst. A39, 876-881' 

_refine_ls_abs_structure_Flack    -0.01(7) 

_refine_ls_number_reflns          5366 

_refine_ls_number_parameters      307 

_refine_ls_number_restraints      0 

_refine_ls_R_factor_all           0.0703 

_refine_ls_R_factor_gt            0.0507 

_refine_ls_wR_factor_ref          0.1294 

_refine_ls_wR_factor_gt           0.1199 

_refine_ls_goodness_of_fit_ref    1.077 

_refine_ls_restrained_S_all       1.077 

_refine_ls_shift/su_max           0.001 

_refine_ls_shift/su_mean          0.000 

  

loop_ 

 _atom_site_label 

 _atom_site_type_symbol 

 _atom_site_fract_x 

 _atom_site_fract_y 

 _atom_site_fract_z 

 _atom_site_U_iso_or_equiv 

 _atom_site_adp_type 

 _atom_site_occupancy 

 _atom_site_symmetry_multiplicity 

 _atom_site_calc_flag 

 _atom_site_refinement_flags 

 _atom_site_disorder_assembly 

 _atom_site_disorder_group 

Cl1 Cl 1.04228(7) 0.78615(8) 0.66005(4) 0.0299(2) Uani 1 1 d . . . 

Cl2 Cl 0.26159(7) 0.90179(8) 0.98814(5) 0.0330(2) Uani 1 1 d . . . 

O1 O 0.3449(2) 0.8152(2) 0.61271(12) 0.0317(6) Uani 1 1 d . . . 

O2 O 0.6068(2) 0.7386(2) 0.62949(11) 0.0259(6) Uani 1 1 d . . . 

O3 O 0.90006(18) 0.8341(2) 0.79016(11) 0.0219(5) Uani 1 1 d . . . 

O4 O 0.79539(19) 1.0466(2) 0.80355(11) 0.0230(5) Uani 1 1 d . . . 

H4A H 0.7853 1.0666 0.8415 0.035 Uiso 1 1 calc R . . 

O5 O 0.74801(19) 1.0959(2) 0.93345(10) 0.0235(5) Uani 1 1 d . . . 

H5A H 0.7613 1.0795 0.8952 0.035 Uiso 1 1 calc R . . 

N1 N 0.4276(2) 1.0545(2) 0.66901(13) 0.0218(6) Uani 1 1 d . . . 

N2 N 0.4705(2) 1.1280(2) 0.71630(13) 0.0238(6) Uani 1 1 d . . . 

C1 C 0.4708(3) 0.9095(3) 0.53202(16) 0.0288(8) Uani 1 1 d . . . 

H1B H 0.4291 0.8637 0.5006 0.043 Uiso 1 1 calc R . . 

H1C H 0.5519 0.8914 0.5296 0.043 Uiso 1 1 calc R . . 

H1D H 0.4595 0.9903 0.5228 0.043 Uiso 1 1 calc R . . 

C2 C 0.4263(3) 0.8826(3) 0.59999(16) 0.0214(7) Uani 1 1 d . . . 

C3 C 0.4826(3) 0.9526(3) 0.65693(16) 0.0187(7) Uani 1 1 d . . . 

C4 C 0.5835(3) 0.9127(3) 0.69251(15) 0.0179(7) Uani 1 1 d . . . 

C5 C 0.6476(3) 0.8031(3) 0.67377(15) 0.0194(7) Uani 1 1 d . . . 

C6 C 0.7605(3) 0.7804(3) 0.70582(14) 0.0181(7) Uani 1 1 d . . . 

C7 C 0.8324(3) 0.6763(3) 0.68233(16) 0.0225(7) Uani 1 1 d . . . 

H7A H 0.8349 0.6758 0.6350 0.027 Uiso 1 1 calc R . . 

H7B H 0.7959 0.6049 0.6967 0.027 Uiso 1 1 calc R . . 

C8 C 0.9581(3) 0.6825(3) 0.70974(16) 0.0221(7) Uani 1 1 d . . . 

H8A H 0.9938 0.6056 0.7058 0.027 Uiso 1 1 calc R . . 

C9 C 0.9589(3) 0.7188(3) 0.78282(15) 0.0231(7) Uani 1 1 d . . . 

C10 C 0.7962(3) 0.8498(3) 0.75680(15) 0.0177(7) Uani 1 1 d . . . 

C11 C 0.7236(3) 0.9476(3) 0.78934(14) 0.0165(7) Uani 1 1 d . . . 

C12 C 0.6230(3) 0.9857(3) 0.74336(15) 0.0159(7) Uani 1 1 d . . . 

C13 C 0.5657(3) 1.0949(3) 0.75107(16) 0.0211(7) Uani 1 1 d . . . 

H13A H 0.5952 1.1466 0.7817 0.025 Uiso 1 1 calc R . . 

C14 C 1.0827(3) 0.7394(4) 0.81080(18) 0.0320(9) Uani 1 1 d . . . 

H14A H 1.1230 0.7945 0.7839 0.048 Uiso 1 1 calc R . . 

H14B H 1.1247 0.6674 0.8112 0.048 Uiso 1 1 calc R . . 

H14C H 1.0769 0.7689 0.8545 0.048 Uiso 1 1 calc R . . 

C15 C 0.8891(3) 0.6303(3) 0.82369(18) 0.0319(9) Uani 1 1 d . . . 

H15A H 0.8125 0.6225 0.8058 0.048 Uiso 1 1 calc R . . 

H15B H 0.8838 0.6570 0.8680 0.048 Uiso 1 1 calc R . . 

H15C H 0.9275 0.5565 0.8227 0.048 Uiso 1 1 calc R . . 

C16 C 0.6708(3) 0.8888(3) 0.85319(15) 0.0186(7) Uani 1 1 d . . . 

H16A H 0.6278 0.8207 0.8396 0.022 Uiso 1 1 calc R . . 

H16B H 0.7351 0.8619 0.8797 0.022 Uiso 1 1 calc R . . 

C17 C 0.5885(3) 0.9636(3) 0.89846(15) 0.0165(7) Uani 1 1 d . . . 

H17A H 0.5649 1.0300 0.8717 0.020 Uiso 1 1 calc R . . 

C18 C 0.6562(3) 1.0181(3) 0.95918(16) 0.0211(7) Uani 1 1 d . . . 

C19 C 0.5700(3) 1.0930(3) 0.99922(16) 0.0252(8) Uani 1 1 d . . . 

H19A H 0.5455 1.1586 0.9730 0.030 Uiso 1 1 calc R . . 

H19B H 0.6093 1.1230 1.0375 0.030 Uiso 1 1 calc R . . 

C20 C 0.4603(3) 1.0228(3) 1.02130(16) 0.0273(8) Uani 1 1 d . . . 

H20A H 0.4836 0.9586 1.0489 0.033 Uiso 1 1 calc R . . 

H20B H 0.4090 1.0726 1.0463 0.033 Uiso 1 1 calc R . . 

C21 C 0.3967(3) 0.9767(3) 0.96069(17) 0.0231(8) Uani 1 1 d . . . 

H21A H 0.3731 1.0440 0.9346 0.028 Uiso 1 1 calc R . . 

C22 C 0.4702(3) 0.8956(3) 0.91531(15) 0.0202(7) Uani 1 1 d . . . 

C23 C 0.7226(3) 0.9308(3) 1.00310(17) 0.0281(8) Uani 1 1 d . . . 

H23A H 0.7628 0.9722 1.0369 0.042 Uiso 1 1 calc R . . 

H23B H 0.7776 0.8886 0.9771 0.042 Uiso 1 1 calc R . . 

H23C H 0.6686 0.8776 1.0225 0.042 Uiso 1 1 calc R . . 

C24 C 0.4000(3) 0.8785(3) 0.85012(16) 0.0225(8) Uani 1 1 d . . . 

H24A H 0.3288 0.8384 0.8593 0.034 Uiso 1 1 calc R . . 

H24B H 0.4453 0.8338 0.8199 0.034 Uiso 1 1 calc R . . 

H24C H 0.3828 0.9529 0.8314 0.034 Uiso 1 1 calc R . . 

C25 C 0.4914(3) 0.7741(3) 0.94762(16) 0.0235(7) Uani 1 1 d . . . 

H25A H 0.4183 0.7393 0.9584 0.035 Uiso 1 1 calc R . . 

H25B H 0.5366 0.7836 0.9866 0.035 Uiso 1 1 calc R . . 

H25C H 0.5324 0.7250 0.9176 0.035 Uiso 1 1 calc R . . 

  

loop_ 

 _atom_site_aniso_label 

 _atom_site_aniso_U_11 

 _atom_site_aniso_U_22 

 _atom_site_aniso_U_33 

 _atom_site_aniso_U_23 

 _atom_site_aniso_U_13 

 _atom_site_aniso_U_12 

Cl1 0.0231(5) 0.0302(5) 0.0362(5) 0.0076(4) 0.0095(4) 0.0035(4) 

Cl2 0.0200(5) 0.0291(5) 0.0498(6) -0.0024(4) 0.0157(4) -0.0052(4) 

O1 0.0203(14) 0.0295(16) 0.0455(16) -0.0063(12) 0.0030(11) -0.0059(11) 

O2 0.0234(13) 0.0205(14) 0.0339(14) -0.0037(10) -0.0067(10) 0.0027(10) 

O3 0.0109(12) 0.0309(14) 0.0240(13) -0.0022(10) -0.0010(9) 0.0031(10) 

O4 0.0190(13) 0.0229(13) 0.0273(13) -0.0008(10) 0.0022(9) -0.0080(10) 

O5 0.0184(12) 0.0285(13) 0.0238(12) -0.0028(10) 0.0032(9) -0.0071(12) 

N1 0.0169(15) 0.0199(16) 0.0285(16) 0.0007(12) 0.0006(11) 0.0003(12) 

N2 0.0224(16) 0.0190(16) 0.0299(16) 0.0021(12) 0.0009(12) 0.0027(12) 

C1 0.030(2) 0.025(2) 0.031(2) 0.0014(15) -0.0071(15) 0.0074(17) 

C2 0.0152(18) 0.0149(18) 0.034(2) 0.0001(14) -0.0017(13) 0.0081(14) 

C3 0.0108(17) 0.0197(18) 0.0256(18) 0.0003(14) 0.0011(13) -0.0027(13) 

C4 0.0138(16) 0.0162(17) 0.0238(17) 0.0048(13) 0.0018(12) 0.0010(14) 

C5 0.0155(17) 0.0186(18) 0.0240(18) -0.0001(13) 0.0013(12) -0.0014(14) 

C6 0.0139(16) 0.0170(17) 0.0233(17) -0.0005(13) 0.0009(12) 0.0044(14) 

C7 0.0215(19) 0.0233(19) 0.0226(18) -0.0036(14) -0.0024(13) 0.0049(15) 

C8 0.0184(18) 0.0216(19) 0.0263(18) 0.0042(13) 0.0020(14) 0.0073(14) 

C9 0.0173(17) 0.0285(19) 0.0234(17) -0.0007(15) -0.0003(13) 0.0122(16) 

C10 0.0075(16) 0.0219(18) 0.0236(18) 0.0025(13) -0.0013(12) -0.0024(13) 

C11 0.0137(17) 0.0157(17) 0.0201(17) 0.0017(12) -0.0005(12) -0.0034(12) 

C12 0.0067(16) 0.0164(17) 0.0246(17) 0.0022(13) 0.0026(12) -0.0026(12) 

C13 0.0186(18) 0.0187(17) 0.0261(18) 0.0025(14) 0.0054(13) -0.0021(14) 

C14 0.023(2) 0.040(2) 0.034(2) -0.0055(17) -0.0088(15) 0.0116(17) 

C15 0.033(2) 0.032(2) 0.031(2) 0.0073(16) 0.0055(16) 0.0092(17) 

C16 0.0142(17) 0.0158(18) 0.0257(18) 0.0025(13) 0.0015(12) -0.0002(13) 

C17 0.0123(16) 0.0146(17) 0.0224(17) 0.0022(13) 0.0004(12) -0.0017(13) 

C18 0.0194(18) 0.0156(18) 0.0282(19) -0.0030(14) 0.0011(14) -0.0052(14) 

C19 0.0279(19) 0.0220(18) 0.0257(19) -0.0042(14) 0.0022(14) -0.0028(15) 

C20 0.028(2) 0.024(2) 0.0291(19) -0.0052(15) 0.0099(15) -0.0009(17) 

C21 0.0137(18) 0.0179(19) 0.038(2) -0.0017(15) 0.0069(14) 0.0016(14) 

C22 0.0166(17) 0.0172(17) 0.0269(18) -0.0008(14) 0.0048(13) -0.0003(14) 

C23 0.028(2) 0.028(2) 0.029(2) 0.0003(15) -0.0049(15) -0.0003(15) 

C24 0.0161(17) 0.0203(19) 0.031(2) -0.0021(14) 0.0001(13) -0.0012(14) 

C25 0.0174(18) 0.0216(19) 0.0315(19) 0.0008(15) 0.0054(13) -0.0033(14) 

  

_geom_special_details 

; 

 All esds (except the esd in the dihedral angle between two l.s. planes) 

 are estimated using the full covariance matrix.  The cell esds are taken 

 into account individually in the estimation of esds in distances, angles 

 and torsion angles; correlations between esds in cell parameters are only 

 used when they are defined by crystal symmetry.  An approximate (isotropic) 

 treatment of cell esds is used for estimating esds involving l.s. planes. 

; 

  

loop_ 

 _geom_bond_atom_site_label_1 

 _geom_bond_atom_site_label_2 

 _geom_bond_distance 

 _geom_bond_site_symmetry_2 

 _geom_bond_publ_flag 

Cl1 C8 1.846(3) . ? 

Cl2 C21 1.868(3) . ? 

O1 C2 1.246(4) . ? 

O2 C5 1.264(4) . ? 

O3 C10 1.390(4) . ? 

O3 C9 1.500(4) . ? 

O4 C11 1.439(4) . ? 

O5 C18 1.484(4) . ? 

N1 C3 1.358(4) . ? 

N1 N2 1.378(4) . ? 

N2 C13 1.362(4) . ? 

C1 C2 1.516(5) . ? 

C2 C3 1.560(5) . ? 

C3 C4 1.448(4) . ? 

C4 C12 1.415(4) . ? 

C4 C5 1.514(5) . ? 

C5 C6 1.481(4) . ? 

C6 C10 1.378(4) . ? 

C6 C7 1.536(4) . ? 

C7 C8 1.556(5) . ? 

C8 C9 1.554(4) . ? 

C9 C15 1.546(5) . ? 

C9 C14 1.557(5) . ? 

C10 C11 1.554(4) . ? 

C11 C12 1.557(4) . ? 

C11 C16 1.594(4) . ? 

C12 C13 1.431(4) . ? 

C16 C17 1.582(4) . ? 

C17 C18 1.597(4) . ? 

C17 C22 1.611(4) . ? 

C18 C23 1.553(5) . ? 

C18 C19 1.551(5) . ? 

C19 C20 1.568(5) . ? 

C20 C21 1.537(5) . ? 

C21 C22 1.568(4) . ? 

C22 C25 1.569(5) . ? 

C22 C24 1.574(5) . ? 

  

loop_ 

 _geom_angle_atom_site_label_1 

 _geom_angle_atom_site_label_2 

 _geom_angle_atom_site_label_3 

 _geom_angle 

 _geom_angle_site_symmetry_1 

 _geom_angle_site_symmetry_3 

 _geom_angle_publ_flag 

C10 O3 C9 117.1(2) . . ? 

C3 N1 N2 119.5(3) . . ? 

C13 N2 N1 119.0(3) . . ? 

O1 C2 C1 125.1(3) . . ? 

O1 C2 C3 118.7(3) . . ? 

C1 C2 C3 116.1(3) . . ? 

N1 C3 C4 124.0(3) . . ? 

N1 C3 C2 112.9(3) . . ? 

C4 C3 C2 123.1(3) . . ? 

C12 C4 C3 116.1(3) . . ? 

C12 C4 C5 121.7(3) . . ? 

C3 C4 C5 122.0(3) . . ? 

O2 C5 C6 122.8(3) . . ? 

O2 C5 C4 119.4(3) . . ? 

C6 C5 C4 117.7(3) . . ? 

C10 C6 C5 119.7(3) . . ? 

C10 C6 C7 122.0(3) . . ? 

C5 C6 C7 118.3(3) . . ? 

C6 C7 C8 110.7(3) . . ? 

C9 C8 C7 111.4(3) . . ? 

C9 C8 Cl1 110.7(2) . . ? 

C7 C8 Cl1 108.7(2) . . ? 

O3 C9 C15 107.2(2) . . ? 

O3 C9 C8 109.4(2) . . ? 

C15 C9 C8 109.9(3) . . ? 

O3 C9 C14 104.1(3) . . ? 

C15 C9 C14 112.3(3) . . ? 

C8 C9 C14 113.7(3) . . ? 

C6 C10 O3 123.6(3) . . ? 

C6 C10 C11 125.8(3) . . ? 

O3 C10 C11 110.3(2) . . ? 

O4 C11 C10 110.6(2) . . ? 

O4 C11 C12 109.1(2) . . ? 

C10 C11 C12 110.3(2) . . ? 

O4 C11 C16 113.0(2) . . ? 

C10 C11 C16 104.4(2) . . ? 

C12 C11 C16 109.3(2) . . ? 

C4 C12 C13 117.1(3) . . ? 

C4 C12 C11 121.2(3) . . ? 

C13 C12 C11 121.7(3) . . ? 

N2 C13 C12 124.1(3) . . ? 

C17 C16 C11 118.5(3) . . ? 

C16 C17 C18 112.2(2) . . ? 

C16 C17 C22 111.6(3) . . ? 

C18 C17 C22 116.0(2) . . ? 

O5 C18 C23 104.2(3) . . ? 

O5 C18 C19 108.0(3) . . ? 

C23 C18 C19 111.8(3) . . ? 

O5 C18 C17 108.0(2) . . ? 

C23 C18 C17 115.9(3) . . ? 

C19 C18 C17 108.6(3) . . ? 

C18 C19 C20 112.5(3) . . ? 

C21 C20 C19 109.3(3) . . ? 

C20 C21 C22 115.3(3) . . ? 

C20 C21 Cl2 108.4(2) . . ? 

C22 C21 Cl2 110.7(2) . . ? 

C21 C22 C25 111.5(3) . . ? 

C21 C22 C24 107.4(3) . . ? 

C25 C22 C24 109.0(3) . . ? 

C21 C22 C17 107.2(3) . . ? 

C25 C22 C17 113.1(3) . . ? 

C24 C22 C17 108.4(2) . . ? 

  

_diffrn_measured_fraction_theta_max    0.969 

_diffrn_reflns_theta_full              26.50 

_diffrn_measured_fraction_theta_full   0.969 

_refine_diff_density_max    0.457 

_refine_diff_density_min   -0.456 

_refine_diff_density_rms    0.072 
